# Supplementary material for: Whole Blood DNA Aberrant Methylation in Pancreatic Adenocarcinoma Shows Association with the Course of the Disease: A Pilot Study
Source: PubMed Central journal article supplement (PMC3358256; doi:10.1371/journal.pone.0037509), 2012-05-22
Supplement: pone.0037509.s001.pdf [file pone.0037509.s001.pdf]

**Figure S1. Wild type and bisulfite converted sequences of studied regions with positioned PCR and SIRPH primers.**

**P16 (cyclin-dependent kinase inhibitor 2A) on NT\_008413 (*Genbank accession number*)**

**Wild type sequence**

21954841 ccactgcact ccagcctggg **CG**acagagaa agactc**CG**tc tcaaaaaaaaa aaaaaaaaaa  
 21954901 aaaaaagttg ttttctgcta tttcctgaac tttatta**CG**t aaatgagaca **CG**tgagatct  
 21954961 ggaaggaggt ggaggtgaag accctccac ctggcctgca tccagagtac ttggggtgtg  
 21955021 gcaactgg**CG**t gggccccagg aaggatccca gccagttttg gtgctggagg cc**CG**gccaaa  
 21955081 ggaagggctg ctctcc**CG**tc **CGCG**ggctc **CG**aggt**CG**c **G**cacc**CG**gg**C** **GCG**cctgggc  
 21955141 ct**CG**tcacc**C** **GCG**ct**CG**tga **CGCG**tgctta caaaggaaac ttttacaggt tt**CG**gtgggc  
 21955201 agggcctttt attgcccttc tgctccacag cccc**CG**tgct taat**CG**gttg gttgggaggt  
 21955261 ttcttt**CG**tc **CG**tggttttg gaaagtccc **G**cctccaaac **CG**cagtcc**CG** cagtcagttc  
 21955321 tgcagcctca gggcct**CG**aa cagccatgct tagaatt**CG**t ccttctttcc tgctccatct  
 21955381 acccttcccc tctggcttct tttttttcac tggagaaagc ccacc**CG**agt ctctcagcct  
 21955441 gctt**CG**gagg ttactg**CG**gc ctctccca**CG** ggtagttctg ggacc**CG**ggt ctagtc**CGCG**

**Bisulfite converted sequence**

21954841 ttattgtatt ttagtttggg **CG**atagagaa agattt**CG**tt taaaaaaaa aaaaaaaaaa  
 21954901 aaaaaagttg ttttttgta ttttttgaat tttatta**CG**t aaatgagata **CG**tgagattt  
 21954961 ggaaggaggt ggaggtgaag atttttttat ttggtttgta tttagagtat ttggggtgtg  
 21955021 gtattgg**CG**t gggtttttagg aaggatttta gttagttttg gtggtggagg tt**CG**gttaaa  
 21955081 ggaagggctg tttttt**CG**tt **CGCG**ggttt **CG**aggt**CG**c **G**tatt**CG**gg**C** **GCG**tttgggt  
 21955141 tt**CG**ttatt**C** **GCG**tt**CG**tga **CGCG**gtttta taaaggaaat ttttataggt tt**CG**gtgggt  
 21955201 agggttttttt attgtttttt tgttttatag tttt**CG**tggt taat**CG**gttg gttgggaggt  
 21955261 tttttt**CG**tt **CG**tggttttg gaaagtttt**C** **G**tttttaaat **CG**tagttt**CG** tagttagttt  
 21955321 tgtagtttta gggttt**CG**aa tagttatggt tagaatt**CG**t tttttttttt tgttttattt  
 21955381 attttttttt tttggttttt ttttttttat tggagaaagt ttatt**CG**agt ttttttagttt  
 21955441 gttt**CG**gagg ttattg**CG**gt ttttttta**CG** ggtagttttg ggatt**CG**ggt ttagtt**CGCG**

**Bi-p16-F1**

**SN-2**

**Bi-p16-R1**

SIRPH Primer P16 SN-2 (-2585 bp from the transcription start site)

## APC (adenomatosis polyposis coli) on NT\_034772 (*Genbank accession number*)

### Wild type sequence

```
14488201 ttctctgtgc tgcaaaaatc atagcaatCG agatgtaatt tattactctc cctcccacct
14488261 cCGgcatcct gtgctaatac ttctgccctg CGgacctccc cCGactcttt actatgCGtg
14488321 tcaactgcca tcaacttcct tgcttgctgg ggactggggc CGCGagggca taccocCGag
14488381 gggtaCGggg ctagggctag gcaggctgtg CGgttgggCG gggccctgtg cccactgCG
14488441 gagtgCGggg CGggaagCGg agagagaagc agctgtgtaa tcCGctggat gCGgaccagg
14488501 gCGctcccca ttccCGtCGg gagccCGcCG attggctggg tgtgggCGca CGtgacCGac
14488561 atgtggctgt attggtgcag ccCGccaggg tgtcactgga gacagaatgg aggtgctgcC
14488621 GgactCGgaa atggggtagg tgctggagcc accatggcca ggcttgctgC Ggggggaggg
14488681 ggaaggtgg tttccctCG cactgtctta aacCGatggc ctttccttgg cacagggtcc
14488741 actgcagcat gccaaaCGag gaggcagggg CGtCGtcccc cCGcccccca ctgcagcact
14488801 ggagatggat ttctgtact tCGgatccag ggtttttgac agaagaggaa gaagggggag
```

### Bisulfite converted sequence

```
14488201 tttttgtgt tgtaaaaatt atagtaatCG agatgtaatt tattatTTTT tttttatTTT
14488261 tCGgtatTTT gtgttaatTT ttttgTTTT CGgattTTTT tCGatTTTT attatgCGtg
14488321 ttaattgtta ttaatTTTT tgtttgttg ggattgggg CGCGagggta tattttCGag
```

#### Bi-APC-F1

```
14488381 gggtaCGggg ttagggtag gtaggttgTG CGgttgggCG gggTTTTgtg ttttattgCG
SN-1
```

```
14488441 gagtgCGggg CGggaagCGg agagaGaaGT agttgtgtaa ttCGttggat gCGgattagg
SN-2
```

```
14488501 gCGtttttta ttttCGtCGg gagttCGtCG attggttggg tgtgggCGta CGtgatCGat
Bi-APC-R1
```

```
14488561 atgtggttgt attggtgtag ttCGttaggg tgttattgga gatagaatgg aggtgttgtC
14488621 GgattCGgaa atggggtagg tgttggagtt attatggta ggtttgttgC Ggggggaggg
14488681 ggaaggtgg ttttttttCG tattgtttta aatCGatggg ttttttttgg tatagggttt
14488741 attgtagtat gttaaaCGag gaggtagggg CGtCGtTTTT tCGtttttta ttgtagtatt
14488801 ggagatggat tttttgtatt tCGgatttag ggtttttgat agaagaggaa gaagggggag
```

SIRPH Primer SN-1 (-131 bp from the transcription start site) and SN-2 (-75 bp from the transcription start site)

### 3OST2 (HS3ST2, Heparan sulfat-D-glucosaminyl-3-O-sulfotransferase-2) on NT\_010393

(Genbank accession number)

#### Wild type sequence

14138701 GCGctcCGaa ccCGgCGcaC Gtaagagcct gggagCGccC GagcCGccCG gctgccCGga  
14138761 gccccatCGc ctaggacCGg gagatgctgg aaatgcaacC Goctgttccc CGaggagcCG  
14138821 ctgccccCGg gacccccctgg cactgtgCGc accctggtca gcagccccCG gagaagaCGg  
14138881 CGcccccaC GccCGaccCG CGtggcCGtg gcagCGccaC GCGagccctc taggCGacCG  
14138941 cagggccaca gcagctcagc CGcCGgtgcc ccctCGgaaa ccatgacccc CGgCGCGggc  
14139001 ccatggagcc atggcctata gggtcctggg cCGCGCGggg ccacctcagc CGCGgaggggC  
14139061 GCGcaggctg ctcttCGcct tcaCGctctC Gctctcctgc acttaoctgt gttacagctt  
14139121 cctgtgctgc tgCGaCGacc tgggtCGgag cCGcctcctC GgCGCGcctC GctgcctcCG  
14139181 CGgccccagC GCGggCGgcc agaaacttct ccagaagtcc CGcccctgtg atccctcCGg  
14139241 gcCGaCGccc agCGagcca gCGctcccag CGCGccCGc GcCGcCGtg cCGcccctCG  
14139301 cctctcCGgt tccaaccact cCGgctcacc caagctgggt accaagCGgt tgccccaaagc  
14139361 cctcattgtg ggCGtgaaga aggggggac cCGggcCGtg ctggagttta tcCGagtaca  
14139421 ccCGgaCGtg CGggccttg gcaCGgaacc ccacttctt gacaggaact aCGgCGCG  
14139481 gctggattgg tacaggtaag gaccaggagc tcCGctcCGt CGcCGggtc tctgatCGct

#### Bisulfite converted sequence

14138701 GCGtttCGaa ttCGgCGtaC Gtaagagttt gggagCGttC GagtCGttCG gttggtCGga  
14138761 gttttatCGt ttaggatCGg gagatggttg aaatgtaatC Gtttgtttt CGaggagtCG  
14138821 ttgttttCGg gatttttttg tattgtgCGt attttggtta gtagttttCG gagaagaCGg  
14138881 CGtttttaC GttCGattCG CGtgggCGtg gtagCGttaC GCGagttttt taggCGatCG  
14138941 tagggttata gtagtttagt CGtCGgtgtt ttttCGgaaa ttatgatttt CGgCGCGggt  
14139001 ttagggagtt atggtttata gggttttggg tCGCGCGggg ttatttttagt CGCGgaggggC  
SN-2  
14139061 GCGtaggttg tttttCGttt ttaCGttttC Gtttttttgt atttatttgt gttatagttt  
14139121 tttgtgttgt tgCGaCGatt tgggtCGgag tCGttttttC GgCGCGtttC GttgttttCG  
Bi-3OST2-R2  
14139181 CGgttttagC GCGggCGggt agaaatttt ttagaagttt CGtttttgtg attttttCGg  
14139241 gtCGaCGttt agCGagttta gCGtttttag CGCGttCGtC GtCGtCGtg tCGtttttCG  
14139301 ttttttCGgt ttttaattatt tCGgtttatt taagttgggt attaagCGgt tgttttaagt  
14139361 ttttattgtg ggCGtgaaga aggggggtat tCGgggCGtg ttggagttta ttCGagtata  
14139421 ttCGgaCGtg CGggtttttg gtaCGgaatt ttattttttt gataggaatt aCGgtCGCG  
14139481 gttggattgg tataggtaag gattaggagt ttCGtttCGt CGtCGgggt tttgatCGtt  
14139541 tttattggga gatttattCG ttttttgtgt ttttttttt ttttaattta atttattgta

SIRPH Primer SN-1 (+99 bp from the transcription start site) and SN-2 (+124 bp from the transcription start site)

# DAP-KINASE (DEATH ASSOCIATED PROTEIN KINASE 1)

on NT\_023935 (*Genbank accession number*)

## Wild type sequence

19278181 tggggaCGcC GacctCGggg tgcCGtggtg ccCGgcccc CGCGCGCGCG gggctgaggg  
19278241 gtCGggggCG tccctggcCG cccagcttta acaaaggggtg ctctctcca cccCGCGagg  
19278301 aggggcagct cCGgagaccC GgtcttcagC GagCGgggtc ttagCGcCGg ggaggtctac  
19278361 ttccttttgg ggttgccatt ttactattat tattgccttt ttttttctt caaaaggact  
19278421 ggagactgat gcatgagggg gctaCGgagg CGcaggagCG gtggtgatgg tctgggaagC  
19278481 Ggagctgaag tgcctgggc tttggtgagg CGtgacagtt tatcatgacC Gtggtcaggc  
19278541 aggaaaaCGt ggatgattac taCGacacCG gCGaggaact tggcaggtaa agggggtacc  
19278601 agaagCGtac cctcctggat tgtggaaatg cataaCGatg gggccattgg gtggtaaaca  
19278661 aatgcagttt gaatcaggCG tctcctCGc cctttctgga gatgCGcaaa tcatagagaa  
19278721 aagagttact aaccagCGg taaacCGcct gatccaaggg cctgggggtg gaggagaggc

## Bisulfite converted sequence

19278181 tggggaCGtC GatttCGggg tgtCGtggtg ttCGgtttta CGCGCGCGCG gggttgaggg  
19278241 gtCGggggCG tttttggtCG tttagtttta ataaaggggtg tttttttta tttCGCGagg  
19278301 aggggtagtt tCGgagattC GgttttttagC GagCGgggtt ttagCGtCGg ggaggtttat  
19278361 ttttttttgg ggttgttatt ttattattat tattgttttt ttttttttt Bi-DAPK-1-F1  
19278421 ggagattgat gtatgagggg gttaCGgagg CGtaggagCG gtggtgatgg tttgggaagC  
19278481 Ggagttgaag tgttttgggt tttggtgagg CGtgatagtt tattatgatC Gtgtttaggt  
19278541 aggaaaaCGt ggatgattat taCGatatCG gCGaggaatt tggtaggtaa agggggtatt  
19278601 agaagCGtat ttttttggat tgtggaaatg tataaCGatg gggttattgg gtggtaaata  
19278661 aatgtagttt gaattaggCG tttttttCGt tttttttgga gatgCGtaaa ttatagagaa  
19278721 aagagttatt aatttagCGg taaatCGttt gatttaaggg tttgggggtg gaggagaggt  
**SN-3** **Bi-DAPK-1-R1**

SIRPH Primer SN-3 (+1262 bp from the transcription start site)

**ACIN1 (apoptotic chromatin condensation inducer 1) on NT\_026437.11 (Genbank accession number)**

**Wild type sequence**

4526761 ctgggctgCG gggCGcatac agatgCGgCG cccctccCGg acCGggccCG cagCGccCGg  
4526821 cagggcactC GggCGggagg aCGtccaggg caCGgCGcca ggccatttcC Gaagagctgg  
4526881 CGgggCGggt gcaccCGgga gCGCGaagct gccagtcccC GccCGcagCG gaaaaCGggC  
4526941 gagCGCGCGg tgaggtgggg aattCGgagc ccaactgCGga gagaccCGgc tcCGggctcc  
4527001 CGgttccCGg ctggcttttg ggactggtgt ggatggaatc ccagctgcaa ggCGgCGgCG  
4527061 ttttgagagc ccatgcaaag caCGgtagca ggtcagctgg gggacactta aggaCGgcag  
4527121 aagggctcag agagtcCGag gccCGggccc agggagCGgg tCGggaacag aggaCGgaca  
4527181 tCGgCGggag gtCGgaggCG ggcagtggaa cccttcttgg gaagctCGgt tacaggggccc  
4527241 aacagagCGa ggagctgcCG ccccctggtg gtagttgtgg gaggcaccaa ggtggcaggc  
4527301 aggtgaccaa acccctaatt taacCGtgca caggaccagg aaccagaaga ggaccacccc  
4527361 tcctagccct gctgggggtgc CGccaCGgac acaggttgct ccatgccttc cCGaatgagg  
4527421 aaggtccaca gctttggggt ggtcagggcc aaggcagggg ataaaagaCG tgggaagttc  
4527481 aataagcagg aagcagtcag cctaaaggaa cacatggaat gagagcaact cctactccag

**Bisulfite converted sequence**

4526761 ttgggcttCG gggCGtatata agatgCGgCG tttttttCGg atCGgggttCG tagCGttCGg  
4526821 tagggtattC GggCGggagg aCGtttaggt taCGgCGtta ggttattttC Gaagagttgg  
4526881 CGgggCGggt gtattCGgga gCGCGaagtt gtttagttttC GttCGtagCG gaaaaCGggC  
4526941 gagCGCGCGg tgaggtgggg aattCGgagt ttattgCGga gagattCGgt ttCGggtttt  
**Bi-ACIN1-F2**  
4527001 CGgtttttCGg ttggtttttg ggattggtgt ggatggaatt ttagttgtaa ggCGgCGgCG  
**SN-1**  
4527061 ttttgagagt ttatgtaaaag taCGgtagta ggttagttgg gggatattta aggaCGgtag  
4527121 aagggtttag agagttCGag gttCGggttt agggagCGgg tCGggaatag aggtaCGata  
**SN-3**  
4527181 tCGgCGggag gtCGgaggCG ggtagtgga ttttttttgg gaagttCGgt tatagggggt  
**Bi-ACIN1-R2**  
4527241 aatagagCGa ggagttgtCG ttttttggtg gtagttgtgg gaggtattaa ggtggtaggt  
4527301 aggtgattaa atttttaatt taatCGtgta taggattagg aattagaaga ggatttattt  
4527361 ttttagtttt gttgggggtgt CGttaCGgat ataggttgtt ttatgttttt tCGaatgagg  
4527421 aaggtttata gttttggggt ggttaggggt aaggtagggg ataaaagaCG tgggaagttt  
4527481 aataagtagg aagtagttag tttaaaggaa tatatggaat gagagtaatt tttattttag

SIRPH Primer SN-1(-548 bp from the transcription start site) and SN-3(-415 bp from the transcription start site)

## BCL2 (antagonist of cell death) on NT\_033903 (*Genbank accession number*)

### Wild type sequence

9342301 tcccaccttc ctgactctag ctggtgtcca ctgagggaca cactccaagt cagttcccag  
9342361 gtcctcaaat accagctgaa tgtctaactt ctgggtgtga cattccagcc cctagaagcc  
9342421 tggcctctgc tgcctcccctg tccttccatg ggtccaactc tccttgCGcC Ggggggggatg  
9342481 accctcacct caccttcCGg tCGcagctct agctgcctcc tccttgaagc cctctctgac  
9342541 tgccctgcCG attcCGggcc ctCGggagct tcCGCGagca gggcCGtggC Gcaatgcac  
9342601 tctgtgccCG gcaccaagaa cCGgccCGgg ttataggggg CGccaataaa tctttctgga  
9342661 aCGgagcccc CGctctgtcC GgggtcccCGc atgaagcctc agtttccagC GacCGCGctg  
9342721 ctgccagcct ggctcagcCG ctcccctccCG cccCGCGagg taccCGggCG gCGctggccc  
9342781 CGggcCGgcc acacagtagc tgctggaaag ggtgacca aataggagCG agtgaccctc  
9342841 tctggggggc CGCGgcaCGg tttgcagagC GCGggatCGg gctgcCGgca gCGctgCGgt  
9342901 cccaatgCGC Gtgctgggga cttggacctg ggcCGCGcag cccagggcCG CGagcCGcCG  
9342961 CGaccccttc CGtctctgtC Gctggatgtc aggcagagcc taagtttccc tCGtaagaca

### Bisulfite converted sequence

9342301 ttttattttt ttgattttag ttggtgttta ttgaggata tattttaagt tagtttttag  
  
9342361 gtttttaaat attagttgaa tgtttaattt ttgggtgtga tatttttagtt tttagaagtt  
9342421 tggtttttgt tgtttttttg tttttttatg ggtttatttt tttttgCGtC Ggggggggatg  
**Bi-BCL2-F1**  
9342481 atttttattt ttttttCGg tCGtagtttt agttgttttt tttttgaagt tttttttgat  
**SN-1**  
9342541 tgttttgtCG atttCGggtt ttCGggagtt ttCGCGagta gggcCGtggC Gtaatgatt  
  
9342601 tttgtgttCG gtattaagaa tCGggtCGgg ttataggggg CGttaataaa tttttttgga  
  
9342661 aCGgagtttt CGttttgttC GgggttttCGt atgaagtttt agtttttagC GatCGCGttg  
9342721 ttgttagttt ggttttagtCG ttttttttCG tttCGCGagg tattCGggCG gCGttggttt  
**Bi-BCL2-R1**  
9342781 CGggtCGggt atatagtagt tgttggaaag ggttgattta aataggagCG agtgattttt  
9342841 tttggggggg CGCGgtaCGg tttgtagagC GCGggatCGg gttgtCGgta gCGttgCGgt  
9342901 tttaatgCGC Gtgttgggga tttggatttg ggtCGCGtag tttaggttCG CGagtCGtCG  
9342961 CGattttttt CGtttttgtC Gttggatgtt aggtagagtt taagtttttt tCGtaagata

SIRPH Primer SN-1 (-496 bp from the transcription start site).

## CD44 on NT\_009237 (*Genbank accession number*)

### Wild type sequence

33947641 CGcCGCGggg ccagCGggag aagaaagcca gtgCGtctct gggCGcaggg gccagtgggg  
33947701 ctCGgaggca caggcaccC GCGacactcc aggttcccCG acccaCGtcc ctggcagccc  
33947761 CGattattta cagcctcagc agagcaCGgg gCGggggcag aggggccCGc cCGggagggc  
33947821 tgctacttct taaaacctct gCGggctgct tagtcacagc ccccttgct tgggtgtgtc  
33947881 cttCGctCGc tccctccctc CGtcttaggt cactgttttc aacctCGaat aaaaactgca  
33947941 gccaaacttcC Gaggcagcct cattgccag CGgaccccag cctctgccag gttCGgtcCG  
33948001 ccatactCGt ccCGtctcC GCGgcccct gccCGCGcc cagggatcct ccagctcctt  
33948061 tCGccCGCGc cctcCGttCG ctcCGgacac catggacaag ttttggtggc aCGcagcctg  
33948121 gggactctgc ctCGtgCGc tgagcctggC GcagatCGgt gagtgccCGc CGcagcctgg  
33948181 gcagcaagat ggggtgCGggg tgctcagCGC GgaccCGgCG gcagcccctc CGgctgagtc  
33948241 ggccctgggg gactggagtc aagtgagctg tctgCGaaagt gcattgggct cCGgaaagca  
33948301 gggctgggat ttgCGctaaa cCGttggaga atgtgtctgt ggaagcacca tttggtttaa

### Bisulfite converted sequence

33947641 CGtCGCGggg ttagCGggag aagaaagtta gtgCGttttt gggCGtaggg gttagtgggg  
33947701 ttCGgaggta taggtatttC GCGatatttt aggtttttCG atttaCGttt ttggtagttt  
33947761 CGattattta tagttttagt agagtaCGgg gCGggggtag aggggttCGt tCGggagggg

#### Bi-CD44-F1

33947821 tgttattttt taaaattttt gCGggttggt tagttatagt tttttttggt tgggtgtggt  
33947881 tttCGttCGt tttttttttt CGtttttaggt tattgttttt aatttCGaat aaaaattgta

#### SN-2

33947941 gttatttttC Gaggtagttt tattgttttag CGgattttag tttttgtag gttCGgttCG  
33948001 ttattttCGt ttCGtttttC GtCGgttttt gtttCGCGtt tagggatttt ttagtttttt

#### Bi- CD44-R1

33948061 tCGttCGCGt ttttCGttCG tttCGgatat tatggataag ttttggtggg aCGtagtttg  
33948121 gggattttgt ttCGtgtCGt tgagtttggC GtagatCGgt gagtggttCGt CGtagtttg  
33948181 gtagtaagat ggggtgCGggg tgtttagCGC GgattCGgCG gtatgttttt CGgttgagtt  
33948241 ggttttgggg gattggagtt aagtgagttg tttgCGaaagt gtattggggt tCGgaaagta  
33948301 gggttgggat ttgCGttaaa tCGttggaga atgtgtttgt ggaagtatta tttggtttaa

### SIRPH Primer SN-2 (+320 bp from the transcription start site)

## RARB (RETINOIC ACID RECEPTOR, $\beta$ ) on NT\_022517 (*Genbank accession number*)

### Wild type sequence

25409521 agcacttctt gtattgtttt taaggtgaga aataggaaag aaaaCGcCGg cttgtgCGct  
25409581 CGctgcctgc ctctctggct gtctgctttt gcagggctgc tgggagtttt taagctctgt  
25409641 gagaatcctg ggagttgggt atgtcagact agttgggtca tttgaagggt agcagccCGg  
25409701 gtagggttca cCGaaagttc actCGcatat attaggcaat tcaatctttc attctgtgtg  
25409761 acagaagtag taggaagtga gctgttcaga ggcaggaggg tctattcttt gccaaagggg  
25409821 ggaccagaat tccccatgC\_Gagctgtttg aggactggga tgcCGagaaC\_GCGagCGatc  
25409881 CGagcaggggt ttgtctgggc acCGtCGggg taggattCGg aaCGcattCG gaaggctttt  
25409941 tgcaagcatt tacttggaag gagaacttgg gatctttctg ggaacccccC\_GcccCGgctg  
25410001 gattggcCGa gcaagcctgg aaaatggtaa atgatcattt ggatcaatta caggctttta  
25410061 gctggccttg ctgtcataat tcatgattCG gggctgggaa aaagaccaac agcctaCGtg  
25410121 ccaaaaaagg ggcagagttt gatggagttg ggtggacttt tctatgccat ttgcctccac  
25410181 acctagagga taagcacttt tgcagacatt cagtgcaagg gagatcatgt ttgactgtat

### Bisulfite converted sequence

25409521 agtatttttt gtattgtttt taaggtgaga aataggaaag aaaaCGtCGg tttgtgCGtt  
25409581 CGttgttttgt ttttttgggt gtttgttttt gtagggttgt tgggagtttt taagttttgt  
25409641 gagaattttg ggagttgggt atgttagatt agttgggtta tttgaagggt agtagttCGg  
25409701 gtagggttta cCGaaagttt attCGtatat attaggaat ttaatttttt attttgtgtg  
**Bi-RARBeta-F1**  
25409761 atagaagtag taggaagtga gttgtttaga ggtaggaggg tttatttttt gttaaagggg  
**SN-1**  
25409821 ggattagaat ttttttatgC\_Gagttgtttg aggattggga tgtCGagaaC\_GCGagCGatt  
**SN-2**  
25409881 CGagtaggggt ttgtttgggt atCGtCGggg taggattCGg aaCGtattCG gaaggttttt  
25409941 tgtaagtatt tttttggaag gagaatttgg gatTTTTTTTt ggaatttttC\_GtttCGgttg  
**Bi-RARBeta-R1**  
25410001 gattggcCGa gtaagtttgg aaaatggtaa atgattattt ggattaatta taggtttttta  
25410061 gttggcttgt ttgttataat ttatgattCG gggttgggaa aaagattaat agtttaCGtg  
25410121 ttaaaaaagg ggtagagttt gatggagttg ggtggatttt tttatgttat ttgtttttat  
25410181 atttagagga taagtatttt tgtagatatt tagtgtaagg gagattatgt ttgattgtat

SIRPH Primer SN-1 (+90 bp from the transcription start site) and SN-2(+125 bp from the transcription start site)



**TNFRSF10C ( tumor necrosis factor receptor superfamily, member 10c, decoy without an intracellular domain) on NT\_023666 (Genbank accession number)**

**Wild type sequence**

1334521 agcctggaca ggaccCGgaa tcaaacCGca ggcctgggt cacCGctgcC Gaaagagcc  
1334581 agttcctgtc CGtccatgca cccaccacca aaaccaggc cttoctggag gtgctagggg  
1334641 aggccatgcc ctttttctga gtgcttgaa gtgactgctg caagtgaca gtgaccaCGc  
1334701 cttttccccc GCGggtataa attcagaggC GctgCGctcC Gattctggca gtgcagctgt  
1334761 gggaacctct ccaCGCGcaC Gaactcagcc aaCGatttct gatagatttt tgggagttt  
1334821 accagagatg caaggggtga aggagCGctt cctacCGtta gggaactctg gggacagagC  
1334881 GcccCGgcCG cctgatggcC Gaggcaggg gCGaccagg acccaggaCG gCGtCGgaa  
1334941 ccataccatg gccCGgatcc ccaagacct aaagttCGtC GtCGtcacCG tCGCGgtcct  
1335001 cctgccagtg agtccCGgcC GCGgtccctg gctggggaag agCGcacctg gCGcCGggag  
1335061 ggggcagga gaCGgggaca CGgcagggat gcctggcct ggtcacctgC GgcCGggcat  
1335121 gtcCGggcag gaCGaactCG cCGtCGgagt caggggaaga actgggtccc CGggctggg  
1335181 aggagggacc CGgcCGCGag ggagcagaga ggCGgtcccc ctggctgcc CGagccCGCG  
1335241 aaggagggga agttccagaa tCGagagagg gagggagtca aggtggaacc catagagtga  
1335301 gcctcctgaa gacacagagC Ggttgcctct ctcattaatt aattaattag ttaataaaat  
1335361 taaccccatg tttacattct taaaCGtggt ccttggagat CGgtttaacc aacagccagt  
1335421 gaaaaaactt ttcagCGctg tcttagcaa ctttcacctc ctctgtcctg aaagtggcag

**Bisulfite converted sequence**

1334881 GtttCGgtCG tttgatggtC Gaggtaggg gCGatttagg atttaggaCG gCGtCGgaa  
1334941 ttatattatg gttCGgattt ttaagatttt aaagttCGtC GtCGttatCG tCGCGgtttt  
1335001 gttgtagtg agtttCGgtC GCGgtttttg gttggggaag agCGtatttg gCGtCGggag  
**Bi-TNFRSF10C-F1**  
1335061 ggggtaggga gaCGgggata CGgtagggat gtttggtttt ggttatattgC GgtCGggat  
Sn-1  
1335121 gttCGgtag gaCGaattCG tCGtCGgagt taggggaaga attgggtttt CGggttggt  
1335181 aggagggatt CGgtCGCGag ggagtagaga ggCGgttttt ttggttggtt CGagttCGCG  
**Bi-TNFRSF10C-R1**  
1335241 aaggagggga agtttttagaa tCGagagagg gagggagtta aggtggaatt tatagagtga  
  
1335301 gttttttgaa gatatagagC Ggttgttttt tttattaatt aattaattag ttaataaaat  
1335361 taattttatg tttatatttt taaaCGtggt ttttggagat CGgtttaatt aatagttagt  
1335421 gaaaaaattt ttttagCGttg tttttagtaa tttttatttt ttttgtttg aaagtggtag

SIRPH Primer SN-1 (+400bp from the transcription start site).

**Alu (accession numbers: Alu-J U14567; Alu-Sb U14568; Alu-Sb1 U14569; Alu-Sb2 U14570; Alu-Sc U14571; Alu-Sp U14572; Alu-Sq U14573; Alu-Sx U14574)**

**Wild type sequences**

```

ps-alu      -----ggcCGggCGCGgtggctcaCGcctgtaatcccagcactttgggagggcCGa 50
sq-alu      -----ggcCGggCGCGgtggctcaCGcctgtaatcccagcactttgggagggcCGa 50
sx-alu      ggCGggCGgagggcCGggCGCGgtggctcaCGcctgtaatcccagcactttggga----- 54
j-alu       -----ggcCGggCGCGgtggctcaCGcctgtaatcccagcactttgggagggcCGa 50
sb1-alu     -----ggcCGggCGCGgtggctcaCGcctgtaatcccagcactttgggagggcCGa 50
sb2-alu     -----ggcCGggCGCGgtggctcaCGcctgtaatcccagcactttgggagggcCGa 50
sb-alu      -----ggcCGggCGCGgtggctcaCGcctgtaatcccagcactttgggagggcCGa 50
sc-alu      -----ggcCGggCGCGgtggctcaCGcctgtaatcccagcactttgggagggcCGa 50

sp-alu      ggCGggCGgatcacctgaggtCGggaggttCGagaccagcctgaccaacatggagaaaccc 110
sq-alu      ggCGgggtggatcacctgaggtcaggaggttCGagaccagcctggccaacatggtgaaaccc 110
sx-alu      ----ggaagatcacctgaggtcaggaggttCGagaccagcctggccaacatggtgaaaccc 110
j-alu       ggCGgggagggatcacttgagcccaggaggttCGagaccagcctgggccaacatagtgaaaccc 110
sb1-alu     ggCGggCGgatca--CGaggtcaggagatCGagaccatccCGgctaaaaCGgtgaaaccc 108
sb2-alu     ggCGgggtggatca--tgaggtcaggagatCGagaccatcctggctaacaagggtgaaaccc 108
sb-alu      ggCGggCGgatca--CGaggtcaggagatCGagaccatcctggctaacaCGgtgaaaccc 108
sc-alu      ggCGggCGgatca--CGaggtcaagagatCGagaccatcctggccaacatggtgaaaccc 108

sp-alu      CGtcttactactaaaaatacaaaaa-ttagcCGggCGtgggtggCGcatgcctgtaatcccag 169
sq-alu      CGtcttactactaaaaatacaaaaa-ttagcCGggCGtgggtggCGggCGcctgtaatcccag 169
sx-alu      CGtcttactactaaaaatacaaaaa-ttagcCGggCGtgggtggCGCGCGcctgtaatcccag 169
j-alu       CGtcttactactaaaaatacaaaaa-ttagcCGggCGtgggtggCGCGCGcctgtagtcccag 169
sb1-alu     CGtcttactactaaaaatacaaaaa-ttagcCGggCGtagtggCGggCGcctgtagtcccag 167
sb2-alu     CGtcttactactaaaaatacaaaaaattagcCGggCGCGgtggCGggCGcctgtagtcccag 168
sb-alu      CGtcttactactaaaaatacaaaaa-ttagcCGggCGtgggtggCGggCGcctgtagtcccag 167
sc-alu      CGtcttactactaaaaatacaaaaa-ttagctgggCGtgggtggCGCGCGcctgtagtcccag 167

sp-alu      ctactCGggaggctgaggcaggagaatCGcttgaaccCGggaggCGgaggttgCGgtgag 229
sq-alu      ctactCGggaggctgaggcaggagaatCGcttgaaccCGggaggCGgaggttgagtgag 229
sx-alu      ctactCGggaggctgaggcaggagaatCGcttgaaccCGggaggCGgaggttgagtgag 229
j-alu       ctactCGggaggctgaggcaggaggtCGcttgagccCGggaggCGgaggttgagtgag 229
sb1-alu     ctactgggaggctgaggcaggagaatggCGtgaaccCGggaggCGgagcttgagtgag 227
sb2-alu     ctactggggaggctgaggcaggagaatggCGtgaaccCGggaagCGgagcttgagtgag 228
sb-alu      ctactCGggaggctgaggcaggagaatggCGtgaaccCGggaggCGgagcttgagtgag 227
sc-alu      ctactCGggaggctgaggcaggagaatCGcttgaaccCGggaggCGgaggttgagtgag 227

sp-alu      cCGagatCGCGccattgcactcca-----gcctgggcaacaagagCGaaactcCGtct 282
sq-alu      cCGagatCGCGccactgcactcca-----gcctgggcaacaagagCGaaactcCGtct 282
sx-alu      cCGagatCGCGccactgcactcca-----gcctgggCGaca-gagCGagactcCGtct 281
j-alu       cCGtgatCGCGccactgcactcca-----gcctgggCGaca-gagCGagaccctgtct 281
sb1-alu     cCGagatccCGccactgcactcca-----gcctgggCGaca-gagCGagactcCGtct 279
sb2-alu     cCGagattgCGccactgcagtcCGcagtcCGgcctgggCGaca-gagCGagactcCGtct 287
sb-alu      cCGagatCGCGccactgcactcca-----gcctgggCGaca-gagCGagactcCGtct 279
sc-alu      cCGagatCGCGccactgcactcca-----gcctgg-CGaca-gagCGagactcCGtct 278

Sp-Alu      CAAAAAAAA 291
Sq-Alu      CAAAAAAAA 291
Sx-Alu      CAAAAAAAA 290
J-Alu       CAAAAAAAA 290
Sb1-Alu     CAAAAAAAA 288
Sb2-Alu     CAAAAAAAA 296
Sb-Alu      CAAAAAAAA 288
Sc-Alu      CAAAAAAAA 287

```

**Bisulfite sequences**

```

                                                Bi-Alu-All-F3
Sp-Alu      -----ggtCGggCGtgggtggtttaCGtttgaattttagtattttgggaggtCGa 50
sq-alu      -----ggtCGggCGtgggtggtttaCGtttgaattttagtattttgggaggtCGa 50
sx-alu      ggCGggCGgaggtCGggCGtgggtggtttaCGtttgaattttagtattttggga----- 54
j-alu       -----ggtCGggCGtgggtggtttaCGtttgaattttagtattttgggaggtCGa 50
sb1-alu     -----ggtCGggCGtgggtggtttaCGtttgaattttagtattttgggaggtCGa 50
sb2-alu     -----ggtCGggCGtgggtggtttaCGtttgaattttagtattttgggaggtCGa 50

```

sb-alu -----ggtCGggCGtgggtgggttaCGtttgtaatttttagtattttgggaggtCGa 50  
sc-alu -----ggtCGggCGtgggtgggttaCGtttgtaatttttagtattttgggaggtCGa 50

sp-alu ggCGggCGgattattttgaggtCGggaggttCGagattagtttgattaatatggagaaattt 110  
sq-alu ggCGggtggattattttgaggttaggaggttCGagattagtttggttaatatggtgaaattt 110  
sx-alu ----ggaagattattttgaggttaggaggttCGagattagtttggttaatatggtgaaattt 110  
j-alu ggCGggaggattattttgaggttaggaggttCGagattagtttggttaatatagtgaaattt 110  
sb1-alu ggCGggCGgatta--CGagggttaggagatCGagattattttCGgttaaaaCGgtgaaattt 108  
sb2-alu ggCGggtggatta--tgagggttaggagatCGagattatttttggttaataaagggtgaaattt 108  
sb-alu ggCGggCGgatta--CGagggttaggagatCGagattatttttggttaataCGgtgaaattt 108  
sc-alu ggCGggCGgatta--CGagggttaagagatCGagattatttttggttaatatggtgaaattt 108

**SN-1** **SN-3**

sp-alu CGtttttattataaaaatataaaaa-ttagtCGggCGtgggtggCGatgttttgtaatttttag 169  
sq-alu CGtttttattataaaaaatataaaaa-ttagtCGggCGtgggtggCGggCGtttgtaatttttag 169  
sx-alu CGtttttattataaaaaatataaaaa-ttagtCGggCGtgggtggCGCGCGtttgtaatttttag 169  
j-alu CGtttttataaaaaatataaaaa-ttagtCGggCGtgggtggCGCGCGtttgtagtttttag 169  
sb1-alu CGtttttattataaaaaatataaaaa-ttagtCGggCGtagtgggCGggCGtttgtagtttttag 167  
sb2-alu CGtttttattataaaaaatataaaaaattagtCGggCGCGgtggtgggCGtttgtagtttttag 168  
sb-alu CGtttttattataaaaaatataaaaa-ttagtCGggCGtgggtggCGggCGtttgtagtttttag 167  
sc-alu CGtttttattataaaaaatataaaaa-ttagttgggCGtgggtggCGCGCGtttgtagtttttag 167

sp-alu ttattCGggagggttgaggtaggagaatCGtttgtaattCGggaggCGgaggttgCGgtgag 229  
sq-alu ttattCGggagggttgaggtaggagaatCGtttgtaattCGggaggCGgaggttgtagtgag 229  
sx-alu ttattCGggagggttgaggtaggagaatCGtttgtaattCGggaggCGgaggttgtagtgag 229  
j-alu ttattCGggagggttgaggtaggagatCGtttgagttCGggagggtCGagggttgtagtgag 229  
sb1-alu ttattgggagggttgaggtaggagaatggCGtgaattCGggaggCGgagtttgtagtgag 227  
sb2-alu ttattggggagggttgaggtaggagaatggCGtgaattCGggaagCGgagtttgtagtgag 228  
sb-alu ttattCGggagggttgaggtaggagaatggCGtgaattCGggaggCGgagtttgtagtgag 227  
sc-alu ttattCGggagggttgaggtaggagaatCGtttgtaattCGggaggCGgaggttgtagtgag 227

**Bi-Alu-All-R2**

sp-alu tCGagatCGCGttattgtatttta-----gtttgggtaataagagtgaaatttCGttt 282  
sq-alu tCGagatCGCGttattgtatttta-----gtttgggtaataagagtgaaatttCGttt 282  
sx-alu tCGagatCGCGttattgtatttta-----gtttgggCGata-gagCGagatttCGttt 281  
j-alu tCGtgatCGCGttattgtatttta-----gtttgggCGata-gagCGagatttCGttt 281  
sb1-alu tCGagatttCGttattgtatttta-----gtttgggCGata-gagCGagatttCGttt 279  
sb2-alu ttgagattgCGttattgtatttta-----gtttgggCGata-gagCGagatttCGttt 287  
sb-alu tCGagatCGCGttattgtatttta-----gtttgggCGata-gagCGagatttCGttt 279  
sc-alu tCGagatCGCGttattgtatttta-----gtttgg-CGata-gagCGagatttCGttt 278

Sp-Alu TAAAAAAAAA 291  
Sq-Alu TAAAAAAAAA 291  
Sx-Alu TAAAAAAAAA 290  
J-Alu TAAAAAAAAA 290  
Sb1-Alu TAAAAAAAAA 288  
Sb2-Alu TAAAAAAAAA 296  
Sb-Alu TAAAAAAAAA 288  
Sc-Alu TAAAAAAAAA 287

SIRPH Primer SN-1, SN-3 and SN-4

## LINE-1 elements (accession number X52235)

### Wild type sequence

61 CGcagaagac ggggtgatttc tgcattttcca tctgaggtac tgggttcate tcactagga  
121 gtgccagaca gtgggCGcag gtcagtgggt gCGCGcacCG tgcaCGagcC GaagcagggC  
181 Gaggcattgt ctcacttggg aagCGcaagg ggtcagggag ttccctttC Gagtcaaaga  
241 aaggggtgaC GgaCGcacct ggaaaatCGg gtctctccca ccCGaatatt9gCGctttCGg  
301 acCGgcttaa aaaaCGgCGc acCGCGagat tatactttgc acctggctag gagggctcta  
361 CGcccaCGga gtctCGctga ttgctagcac agcagtctga gatcaaactg caaggcCGca  
421 gcaaggctgg gggaggggCG ccCGccattg cccaggcttg cttgggtaaa caaagcagcc  
481 tggcagctCG aactgggtgg agcccaccac agctcaagga ggctgctg cctttgtagg

### Bisulfite sequence

61 CGtagaagat ggggtgatttt tgtatTTTTa tttgaggtat tgggtttatt ttattagga **Bi-LINE-1-F1**  
121 gtgttagata gtgggCGtag gttagtgggt gCGCGtatCG tgtaCGagtc GaagtagggC  
181 Gaggattgt tttatttggg aagCGtaagg ggttagggag ttttttttC Gagttaaga  
SN-1 SN-8  
241 aaggggtgaC GgaCGtattt ggaaaatCGg gttttttta ttCGaatatt gCGttttCGg  
301 atCGgtttaa aaaaCGgCGt atCGCGagat tatactttgt atttggttag gagggttta  
361 CGtttaCGga gtttCGtga ttgttagtat agtagttga gattaaattg taaggCGta  
421 gtaaggttgg gggaggggCG ttCGttattg tttaggtttg tttgggtaaa taaagtagtt  
Bi-LINE-1-R1  
481 tggtagttCG aattgggtgg agtttattat agtttaaggga ggtttgtttg tttttgtagg

SIRPH Primer: SN-1 and SN-8.
