# Supplementary material for: Whole Blood DNA Aberrant Methylation in Pancreatic Adenocarcinoma Shows Association with the Course of the Disease: A Pilot Study
Source: PubMed Central journal article supplement (PMC3358256; doi:10.1371/journal.pone.0037509), 2012-05-22

**Supplemental figure S2. HPLC chromatograms samples of investigated CpGs. First peak indicates primer second- ddCTP and third- ddTTP extended oligos. Peak height is automatically calculated by the WAVEMAKER™ software (Transgenomic).**

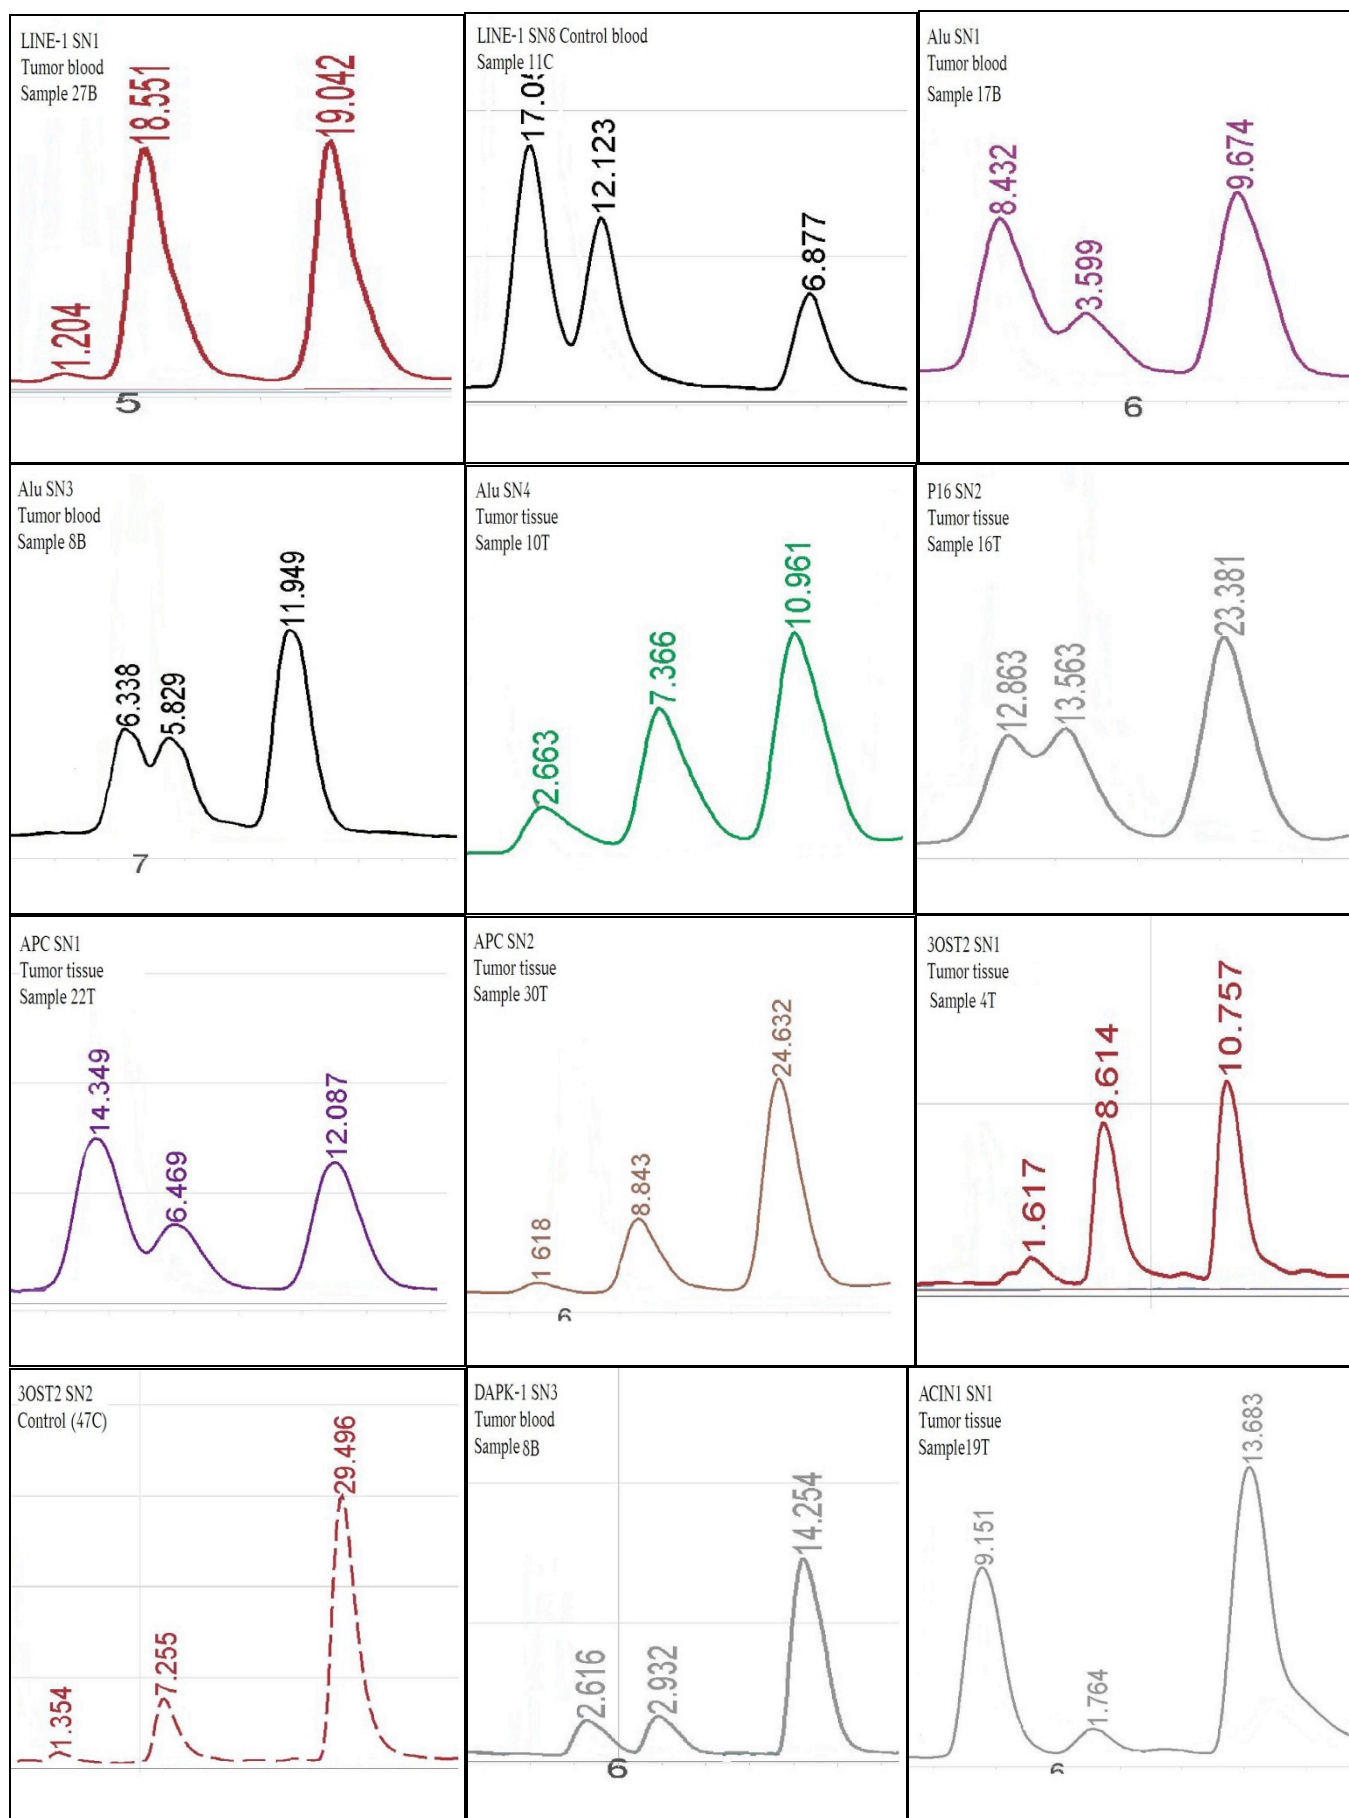

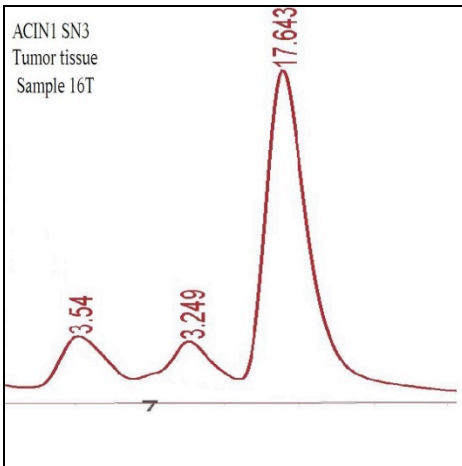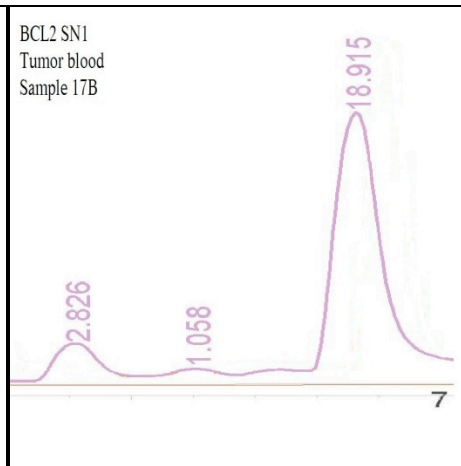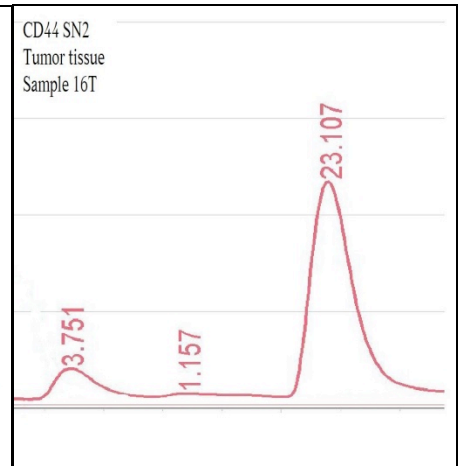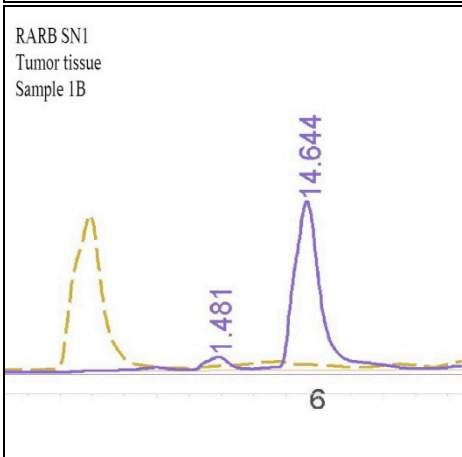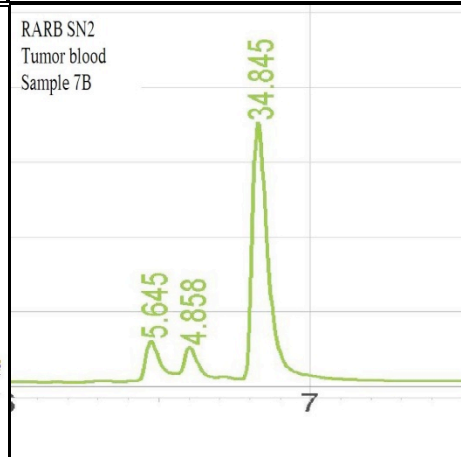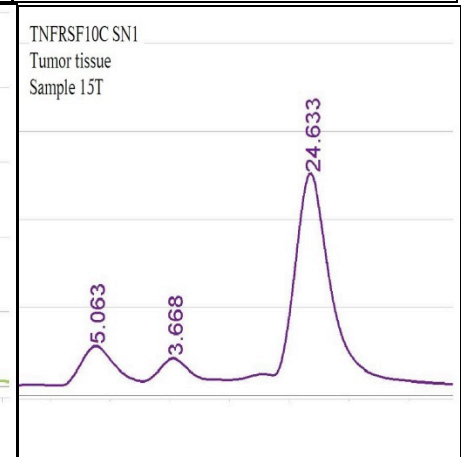

Supplement: pone.0037509.s002.pdf [file pone.0037509.s002.pdf]
