# Supplementary material for: Whole Blood DNA Aberrant Methylation in Pancreatic Adenocarcinoma Shows Association with the Course of the Disease: A Pilot Study
Source: PubMed Central journal article supplement (PMC3358256; doi:10.1371/journal.pone.0037509), 2012-05-22
Supplement: pone.0037509.s003.pdf [file pone.0037509.s003.pdf]

**Supplemental table S1. Specific primers used for methylation-specific polymerase chain reaction (Bi) and SIRPH (SN) analysis.**

| Region    | Oligo name      | Sequence                                | Genbank accession number       | Bp  | Annealing °C |          |
|-----------|-----------------|-----------------------------------------|--------------------------------|-----|--------------|----------|
| Alu       | Bi-Alu-All-F3   | ttg taa ttt tag tat ttt gg              | Consensus sequence             | 238 | 53           |          |
|           | Bi-Alu-All-R2   | cca aac taa aat aca ata a               |                                |     |              |          |
|           | Alu SN-1        | aat ata aaa att agt                     |                                |     |              |          |
|           | Alu SN-3        | ttt gta att tta gtt att                 |                                |     |              |          |
|           | Alu SN-4        | gag gtt gta gtg agt                     |                                |     |              |          |
| LINE-1    | Bi-LINE-1-F1    | att tta tta ggg agt gtt aga tag tgg g   | Consensus sequence             | 410 | 59           |          |
|           | Bi-LINE-1-R1    | tta aac tat aat aaa ctc cac cca at      |                                |     |              |          |
|           | SN-1            | gaa agg ggt gat ga                      |                                |     |              |          |
|           | SN-8            | ggg ttt ttt tta tt                      |                                |     |              |          |
| P16       | Bi-p16-F1       | gat ttt agt tag ttt tgg tgt t           | <b>NT_008413</b><br>21955044   | 213 | 58           |          |
|           | Bi-p16-R1       | aaa aaa acc tcc caa cca ac              | 21955266                       |     |              |          |
|           | SN-2            | ttt ata aag gaa att ttt ata ggt tt      |                                |     |              |          |
| APC       | Bi-APC-F1       | ggg tta ggg tta ggt agg ttg t           | <b>NT_034772</b><br>14488388   | 231 | 61           |          |
|           | Bi-APC-R1       | aca cct cca ttc tat ctc caa taa c       |                                |     |              | 14488618 |
|           | SN-1            | gaa gta gtt gtg taa tt                  |                                |     |              |          |
|           | SN-2            | att ggt tgg gtg tgg g                   |                                |     |              |          |
| 3OST2     | Bi-3OST2-F2     | tgg agt tat ggt tta tag ggt ttt g       | <b>NT_010393</b><br>14139004   | 217 | 56           |          |
|           | Bi-3OST2-R2     | aaa ctt cta aaa aaa ttt cta acc         |                                |     |              | 14139220 |
|           | SN-1            | ggg tta ttt tag t                       |                                |     |              |          |
|           | SN-2            | gta ggt tgt ttt t                       |                                |     |              |          |
| ACIN1     | Bi-ACIN1-F2     | gga ttg gtg tgg atg gaa ttt tag ttg taa | <b>NT_026437.11</b><br>4527021 | 286 | 61           |          |
|           | Bi-ACIN1-R2     | tca cct acc tac cac ctt aat acc t       |                                |     |              | 4527306  |
|           | SN-1            | gtt tat gta aag ta                      |                                |     |              |          |
|           | SN-3            | gta gtg gaa ttt ttt ttg gga agt t       |                                |     |              |          |
| BCL2      | Bi-BCL2-F1      | ttg aag ttt ttt ttg att gtt ttg t       | <b>NT_033903</b><br>9342524    | 297 | 60           |          |
|           | Bi-BCL2-R1      | taaac aac cct ttc caa caa cta c         |                                |     |              | 9342820  |
|           | SN-1            | tgt att ttt gtg tt                      |                                |     |              |          |
| CD44      | Bi-CD44-F1      | ata gtt ttt ttt gtt tgg gtg tgt t       | <b>NT_009237</b><br>33947855   | 254 |              |          |
|           | Bi-CD44-R1      | cca cca aaa ctt atc cat aat atc c       |                                |     |              | 33948109 |
|           | SN-2            | agt ttt tgt tag gtt                     |                                |     |              |          |
| DAPK-1    | Bi-DAPK-1-F1    | taa aag gat tgg aga ttg atg tat ga      | <b>NT_023935</b><br>19278411   | 192 | 56           |          |
|           | Bi-DAPK-1-R1    | taa tac ccc ctt ctt tac cta cca aat t   |                                |     |              | 19278602 |
|           | SN-3            | tgg atg att att a                       |                                |     |              |          |
| RARb      | Bi-RARb-F1      | aga ggt agg agg gtt tat ttt ttg t       | <b>NT_022517</b><br>25409788   | 249 | 61           |          |
|           | Bi-RARb-R1      | aat cat tta cca ttt tcc aaa ctt act     |                                |     |              | 25410036 |
|           | SN-1            | ttg agg att ggg atg t                   |                                |     |              |          |
|           | SN-2            | agt agg gtt tgt ttg ggt at              |                                |     |              |          |
| TNFRSF10C | Bi-TNFRSF10C-F1 | gga tgt ttg gtt ttg gtt att tg          | <b>NT_023666</b><br>1335087    | 208 | 60           |          |
|           | Bi-TNFRSF10C-R1 | tat aaa ttc cac ctt aac tcc ctc c       |                                |     |              | 1335294  |
|           | SN-1            | gag tta ggg gaa gaa ttg ggt ttt         |                                |     |              |          |
